# Supplementary material for: Reconstruction of Paprosky type III Acetabular Defects by the Three-dimensional Printed Porous Augment: Techniques and Clinical Outcomes of 18 Consecutive Cases
Source: Research Square preprint supplement (doi:10.21203/rs.3.rs-94006/v1), 2020-10-21
Supplement: Supplementary file 1 [file ec0a5a310e3af179c5f52954.xlsx]

## Sheet: 临床资料
	本次手术日期	随访时间	Paprosky	术前HHS	末次随访HHS	ID号	姓名	性别	年龄	体重（Kg）	身高（米）	身高²	BMI	初次诊断	入院诊断	初次置换	第一次翻修	第二次翻修	合并症	窦道	CRP	IL-6	ESR	术前培养	术后培养	冰冻	病理	术者	出血量	手术时间（h）	界面	髋臼假体	髋臼大小	股骨假体	股骨型号	股骨头大小	股骨颈	加强块螺钉数量	螺钉长度（mm）	螺钉直径（mm）	备注-并发症
未松动	2016.4.8	56	3A	27	97	Y1430491	徐所凤	女	37	50	1.58	2.4964	20.0288	左髋DDH	左髋占位器植入术后	2011.4.11	2015.8.6	2016.4.8		无	1.59	4.44	5	无	无	<5	<5	陈继营	2000	4	COC	Continuum	46	LCU	9	28	3.5-	2	65，45	4.5
未见随访片子	2017.6.1	42	3A	54	94	K0058097	陈英	女	50	85	1.62	2.6244	32.3884	右髋化脓性关节炎僵直	右髋占位器植入术后	2015	2016.12	2017.6.1		无	1.7	23.33	18	无	沃氏普通球菌	>15	>15	郝立波	2000	4	COC	Pinnacle	54	Ribbed	4	36	4+	2	30，25	6.5	脱位
未见随访片子	2017.7.17	41	3B	26	82	Y2565910	隋凤敏	女	66	70	1.56	2.4336	28.764	右股骨头坏死	右髋翻修术后	2005	2015.1	2017.7-17		无	0.09	1.99	7	无	无	无	无	周勇刚	1200	4	COC	Pinnacle	72	未翻修		36	7+	3	30，30，30	6.5
未见随访片子	2017.7.17	41	3A	62	78	Y2367523	杨春秀	女	53	70	1.62	2.6244	26.6728	右髋DDH	右髋占位器植入术后	2014.1.6	2016.11.24	2017.7.17	臀中肌修补术	无	0.7	5.56	22	无	人葡萄球菌	5-8	5-8	陈继营	2000	4.4	COC	Combicup	48	MP		32	0	4	45，30，25，25	6.5
未松动	2017.8.30	39	3B	53	83	Y2855032	赵太平	男	56	60	1.64	2.6896	22.3081	AS	左髋占位器术后	2003年	2017.1	2017.8.30		无	1.7	8.5	17	无	无	<5	<5	周勇刚	3000	5.5	COC	Pinnacle	58	MP	5	36	0	5	30，25，25，20，20	6.5
	2017.9.12	39	3A	39	81	K0135421	郝芳芝	女	68	70	1.55	2.4025	29.1363	左股骨头坏死	左髋占位器术后	2016.9.9	2016.9.25	2017.9.12		无	0.187	1.99	10	无	人葡萄球菌	<5	<5	陈继营	2000	6	COP	Trilogy	50	MP		32	4-	2	45，25	6.5
	2017.12.14	36	3B	34	86	D600320	柴玉萍	女	53	65	1.6	2.56	25.3906	右髋DDH	右髋翻修术后	1999年	2012年		无	无	0.464	2.07	49	无	无	<5	<5	陈继营	350	6	COC	Continuum	48	未翻修	未翻修	32	9+	3	40，35，35	6.5	Cable-Ready
	2017.12.14	36	3A	28	97	798312	陈鹏	男	62	75	1.75	3.0625	24.4898	左髋化脓性关节液	左髋THA术后	1982年	2003年	2017.12.14	无	无	0.104	1.49	22	无	无	无	无	张国强	3000	5	COC	Pinnacle	66	MP		36	0	4	45，40，40，25	6.5
	2018.3.14	33	3B	61	96	Y2989249	杨静远	男	32	130	2.04	4.1616	31.238	右股骨头坏死	右髋THA术后	2004			垂体功能低下	无	<0.1	<2	14	无	无	无	无	周勇刚	1000	3	COP	Pinnacle	70	未翻修	未翻修	36	5+	2	20，30	6.5
	2018.6.8	30	3B	19.5	75	Y1395722	陈香芹	女	71	54	1.58	2.4964	21.6311	左股骨头坏死	左髋占位器术后	2006	2016	2016.12.26	糖尿病	无	0.671	2.21	34	无	无	<5	<5	张国强	2000	5	COP	TM Cup-cage	60	MP		28	3.5+	2	30，30		术中未使用
	2018.8.28	28	3B	45	91	Y2841415	刘洪胜	男	49	70	1.7	2.89	24.2215	AS	左髋占位器术后	2004	2004	2017.8.2		无	<0.05	11.61	14	无	无	<5	<5	陈继营	2000	4	COC	Pinnacle	52	MP		36	4-	3	20,20,25	6.5
	2018.8.29左	28	3A	52	94	Y3671362	张亦宁	女	46	70	1.6	2.56	27.3438	股骨头坏死	左髋THA术后	2004			系统性红斑狼疮	无	0.257	5.01	23	无	无	无	无	周勇刚	1400	2.5	COC	Pinnacle	58	未翻修		36	8+	2	25，30	6.5
	2018.9.3右	27	3A	53	94	Y3671362	张亦宁	女	46	70	1.6	2.56	27.3438	股骨头坏死	右髋THA术后	2004			系统性红斑狼疮	无	0.257	5.01	23	无	无	无	无	周勇刚	800	2.5	COC	Pinnacle	60	未翻修		36	8+	2	25，30	6.5
	2018.9.19	27	3A	71	94	967688	鹿霞	女	39	50	1.63	2.6569	18.8189	骨巨细胞瘤	右髋翻修术后	1998	2007		无	无	0	7.94	23	无	无	<5	无	周勇刚	1500	4	COC	Pinnacle	62	未翻修		36	8+	2	25，30
	2018.11.15	25	3A	60	82	Y3517649	韩宝军	男	51	80	1.7	2.89	27.6817	右髋骨折	右髋占位器术后	2004.09	2018.7.8		无	无	0.701	4.39	10	阴性	阴性	5-10	10	李想	1500	6	COP	TM	60	MP		36	0	3	30,45,50	6.5
	2018.12.5	24	3A	16	96	K0303865	陈杰	男	18	55	1.8	3.24	16.9753	右髋骨折	右髋占位器术后	2018.2.14	2018.8.3		无	无	0.116	<1.5	1	无	阴性	<5	<5	陈继营	800	3.5	COC	Pinnacle	60	Corail	13	36	1.5+	3	35,45,45	6.5
	2018.12.21	24	3B	10.5	95	K0357871	李建堂	男	41	83	1.71	2.9241	28.3848	左股骨头坏死	左髋THA术后	1999年			无	无	0.121	4.21	36	无	大肠埃希菌、头状葡萄球菌	无	无	柴伟	2700	3	COP	Pinnacle	56	未翻修		36	3.5+	2	50，50	6.5
	2019.1.6	24	3B	13.5	76	K0376798	马英珍	女	63	75	1.75	3.0625	24.4898	右侧股骨颈骨折	右髋关节翻修术后	2018.12.15	2018.12.22		高血压	无	0.24	3.34	6	无	无	5-10	6	张国强	2000	5	COP	TM Cup-cage	56	未翻修		36	3.5-	2	30，30	6.5	术中未使用
	2019.6.5		3B			Y4181598	董伟	女	39	52.5	1.53	2.3409	22.4273	右髋DDH	右髋THA术后	2004			DDH矫形术后	无	0.054	<2	11	无	无	<5	<5	陈继营	500	3	COP	TM	50	未翻修		28	5+	3	15，25，30	6.5
	2019.6.14		3B			Y4198152	孙岳清	女	53	60	1.6	2.56	23.4375	右侧股骨头坏死	右髋THA术后	1994.06			类风湿性关节炎	无	0.93	5.79	22	无	无	无	无	陈继营	1500	4.5	COP	TM	66	MP		32	0	2	20,50	6.5	TM augment
	2019.4.15		3B			Y4000444	郝伟	男	64	74.7	1.73	2.9929	24.9591	左侧股骨头坏死	左髋翻修术后	2000	2005		高血压	无	0.115	5.1	7	无	无	<5	<5	周勇刚	600	4	COC	Pinnacle	62	未翻修		36	8+	3	45，50，50	6.5
	2019.7.3		3B			Y3360698	赵利	男	76	75	1.68	2.8224	26.5731	左侧股骨头坏死	左髋THA术后	1995			高血压、腰椎管狭窄	无	1.152	12.74	7	阴性	阴性	<5	<5	周勇刚	600	3	COC	TM	68	MP		32	0	2	50，50	6.5
	2019.7.8		3B			Y4274079	吕宝霞	女	52	61	1.56	2.4336	25.0657	左侧股骨头坏死	左髋翻修术后	2004.12	2010.07		无	无	0.097	<1.5	7	阴性	阴性	<5	<5	周勇刚	500	3	COC	Pinnacle	58	未翻修		36	8+	1	50	6.5
	2019.9.25		2B			Y3304454	吴克	女	58	62.5	1.56	2.4336	25.6821	左侧股骨颈骨折	左髋占位器术后	2013	2018.03	2018.8.14	抑郁症	无	0.446	45.6	2	无	阴性	无	<5	陈继营	1700	4	COC	Pinnacle	66	MP		36	4-	3	15,20,35	6.5
	2019.9.25		3A			929730	张精巧	女	33	40	1.53	2.3409	17.0874	左髋DDH	左髋THA术后	2008.12.18				无	0.1	<1.5	6	无	阴性	无	无	周勇刚	1000	3	COC	Pinnacle	50	未翻修		32	6+	3	15,20,20	6.5

## Sheet: 测量指标
	术前		术后		随访
姓名	下肢长度差（mm）	旋转中心上移（mm）	下肢长度差（mm）	旋转中心上移（mm）	下肢长度差（mm）	旋转中心上移（mm）
徐所凤	59	72.3	8	10.1	8	11.2
陈英	25	49.2	13	21.8	10	22.5
隋凤敏	16	34.2	3	27.3	2	27.4
杨春秀	41	61.3	1	20.6	0	21.1
赵太平	27	39.7	3	25.3	6	23.8
郝芳芝	16	54.7	4	38.2	5	38.4
柴玉萍	33	39.7	21	19.9	18	20
陈鹏	36	38.1	17	40.3	15	40.5
杨静远	21	59.8	6	34.8	5	35
陈香芹	50	69.1	4	24.8	6	24.2
刘洪胜	57	56.8	20	18.9	18	18.2
张亦宁-左	3	23.3	7	11.9	6	11
张亦宁-右	3	25.1	7	21.2	6	21
鹿霞	29	40.9	9	15.8	11	16.2
韩宝军	53	73.3	4	23.8	5	23
陈杰	28	63	3	23.6	5	25
李建堂	18	37.6	6	19.1	6	19.5
马英珍	55	75.3	2	14.7	3	15.2
董伟	27	48.8	5	24.6	6	25.2
孙岳清	15	44.2	3	29.3	5	30
郝伟	36	78.6	7	42.7	5	43.1
赵利	23	52.3	10	22.1	8	21.2
吕宝霞	2	14.3	4	7.3	5	8
吴克	25	23.4	9	21.9	7	20.2
张精巧	6	15.2	3	8.6	4	9.2

## Sheet: 随访
ID号	姓名	性别	术前HHS	末次随访HHS	本次手术日期	随访时间	HSS	片子	备注
Y1430491	徐所凤	女	27	97	2016.4.8	2019.06	97	√	很好
Y1979032	许清玲	女	42	94	2016.5.16	2019.06
K0058097	陈英	女	54	94	2017.6.1	2019.06	94		很好，与上次随访相比没有变化
Y2565910	隋凤敏	女	26	71	2017.7.17	2019.06	82		出门单拐，室内助行器，肌力差，穿鞋穿袜可
Y2367523	杨春秀	女	62	75	2017.7.17	2019.06	78	去拍片	活动时间久了会有疼痛，一直单拐，穿袜困难
Y2855032	赵太平	男	53	83	2017.8.30	2019.06	83		很好，与上次随访相比没有变化
K0135421	郝芳芝	女	39	81	2017.9.12	2019.06	81		室内不拄拐，室外必须双拐，穿袜基本，肌力差
D600320	柴玉萍	女	34	85	2017.12.14	2019.06	86		肌力差
Y3096654	程秀芝	女	48	90	2017.12.16	2019.06	92		穿袜可，上下楼可，其他很好
798312	陈鹏	男	28	87	2017.12.14	2019.06	97	√	因未术腿疼痛，走远路拄手杖，不能穿袜，坐位起来辅助，上下楼辅助
Y2989249	杨静远	男	61	96	2018.3.14	2019.06	96		很好，半蹲
K0235679	李桂芝	女	29	90	2018.6.1	2019.06	92	家属不在，不方便拍片	很好，穿袜稍困难，上下楼辅助，久坐稍僵，半蹲110
Y1395722	陈香芹	女	19.5	75	2018.6.8
Y3439616	张海燕	女	37	94	2018.6.27	2019.06	85		稍有疼痛，穿袜困难，肌力差，自觉术腿越来越短（可能是肌力越来越差），术后半年开始，平躺臀部抬起时有咔哒异响，走路偶尔有咔哒异响，不确定是否为假体异响
Y2841415	刘洪胜	男	45	92	2018.8.28		91		穿袜困难，其他很好
Y3671362	张亦宁	女	52	94	2018.8.29左	2019.06	94		与上次随访没有变化
Y3671362	张亦宁	女	53	94	2018.9.3右	2019.06	94
967688	鹿霞	女	71	91	2018.9.19		94		穿鞋袜方便，术腿短，肌力差，国外近期不能拍片
Y3517649	韩宝军	男	60	90	2018.11.15	2019.06	82		室内不拄拐，室外拄拐，穿袜困难，自述术腿短，肌力差
K0303865	陈杰	男	16	93	2018.12.5	2019.06	96	√
K0357871	李建堂	男	10.5	92	2018.12.21	2020.01	95		很好，深蹲，穿袜稍困难
K0376798	马英珍	女	13.5	76	2019.1.26
Y4181598	董伟	女	24	76	2019.6.5	2019.12	91	√	肌力差，可蹲
Y4198152	孙岳清	女	64	70	2019.6.14		84		无疼痛，不能穿鞋穿袜穿裤子，肌力差，上下楼辅助，走路可
Y4000444	郝伟	男	50	96	2019.4.15	2020.01	96		很好，肌力差，不能深蹲
Y3360698	赵利	男	40	90	2019.7.3	2020.01	90	不拍片	穿袜稍有困难，肌力差，上下楼辅助，下蹲可，术腿自觉稍长
Y4274079	吕宝霞	女	41	90	2019.7.8	2020.01	90		走多后屁股后侧稍有疼痛，穿袜困难，110，上下楼不辅助，肌力差
Y3304454	吴克	女	12	70	2019.9.25		75	√	双拐，短距离单拐，腹股沟偶尔疼痛（坐着扭动身体），走多后屁股后偶尔疼痛，穿鞋穿袜可
929730	张精巧	女	19.5	97	2019.9.25	2020.01	97		很好
